# Supplementary material
Source: PubMed Central journal article supplement (PMC3353023)
Supplement: NIHMS363999-supplement-01.pdf [file NIHMS363999-supplement-01.pdf]

**Table 1. Effects of HP protocol on Chemokine Genes in BMSCs (fold alterations vs. normoxic control BMSCs)**

| Gene              | Hypoxia (24 hr) | Hypoxia (24hr) + Reoxygenation (24 hr) |
|-------------------|-----------------|----------------------------------------|
| Complement C5     | -55.6851        | -52.4278                               |
| Ccl12 (predicted) | -2.0477         | -2.7585                                |
| Ccl17             | -86.1345        | -81.0961                               |
| Ccl2              | -2.0821         | 1.5428                                 |
| Ccl24             | -2.6205         | -2.4672                                |
| Ccl3              | -2.3313         | -274.309                               |
| Ccl4              | -1.0053         | -118.288                               |
| Ccl5              | -1.2297         | -119.889                               |
| Ccl6              | 2.9003          | 3.4695                                 |
| Ccl7              | -1.4511         | 1.6348                                 |
| Ccl9              | 1.0355          | -70.2809                               |
| Cx3cl1            | -78.12          | -73.5503                               |
| Cx3cr1            | -1.5625         | -136.481                               |
| Cxcl1             | -3.5569         | -1.0747                                |
| Cxcl10            | -143.6108       | -135.21                                |
| Cxcl11            | -2.6205         | -2.4672                                |
| Cxcl12            | -7.6604         | -4.7901                                |
| Cxcl2             | -2.6205         | -2.4672                                |
| Cxcl5             | -2.6205         | -2.4672                                |
| Cxcl9             | -2.6205         | -2.4672                                |
| Il13              | -2.6205         | -2.4672                                |
| Cxcl4             | -1.2386         | 1.3421                                 |

Footnote for Table 1 – 5: HP protocol: 0.5% O<sub>2</sub>. N=2-3 measurements.

**Table 2. Effects of HP on Cytokine Genes in BMSCs  
(fold alterations vs. normoxic control BMSCs)**

| <b>Gene</b>     | <b>Hypoxia<br/>(24 hr)</b> | <b>Hypoxia (24hr)<br/>+<br/>Reoxygenation<br/>(24 hr)</b> |
|-----------------|----------------------------|-----------------------------------------------------------|
| Ifng            | -2.6205                    | -2.4672                                                   |
| Il10            | -2.6205                    | -2.4672                                                   |
| Il11            | -1.2357                    | 1.1881                                                    |
| Il13            | -2.6205                    | -2.4672                                                   |
| Il15            | -2.7553                    | -1.3716                                                   |
| Il16            | -1.2742                    | -77.8897                                                  |
| Il17b           | 58.7461                    | -55.3097                                                  |
| Il18            | -1.6775                    | 1.1686                                                    |
| Il1a            | 43.4661                    | -40.9236                                                  |
| Il1b            | 2.6348                     | -50.8283                                                  |
| Il3             | -2.6205                    | -2.4672                                                   |
| Il4             | -2.6205                    | -2.4672                                                   |
| Itgam<br>(OX42) | 43.2635                    | -2.4672                                                   |
| Itgb2           | 1.4266                     | 1.9532                                                    |
| Lta             | 11.8653                    | -2.4672                                                   |
| Ltb             | 90.8063                    | -85.4945                                                  |
| Mif             | 2.7725                     | -1.061                                                    |
| Scye1           | -1.9464                    | -1.2234                                                   |
| Spp1            | -1.4024                    | -1.3174                                                   |
| Tgfb1           | -1.8693                    | -1.4369                                                   |
| Tnf             | -2.6205                    | -2.4672                                                   |

**Table 3. Effects of HP on Chemokine Receptors in BMSCs  
(fold alterations vs. normoxic control BMSCs)**

| <b>Gene</b>  | <b>Hypoxia<br/>(24 hr)</b> | <b>Hypoxia (24hr)<br/>+<br/>Reoxygenation<br/>(24 hr)</b> |
|--------------|----------------------------|-----------------------------------------------------------|
| Ccr1         | 2.0573                     | 4.134                                                     |
| Ccr2         | -2.6205                    | -2.4672                                                   |
| Ccr3         | -2.6205                    | -2.4672                                                   |
| Ccr4         | -2.6205                    | -2.4672                                                   |
| Ccr5         | 1.0827                     | 2.4028                                                    |
| Ccr6         | -2.6205                    | -2.4672                                                   |
| Ccr9         | -2.6205                    | -2.4672                                                   |
| Cx3cr1       | -1.5625                    | -136.481                                                  |
| Cxcr3        | -79.8223                   | -75.1531                                                  |
| Ccr10 (GRP2) | -1.9505                    | 1.7484                                                    |
| Il8ra        | -2.6205                    | -2.4672                                                   |
| Il8rb        | -2.6205                    | -2.4672                                                   |

**Table 4. Effects of HP on Cytokine Receptors in BMSCs (fold alterations vs. normoxic control BMSCs)**

| <b>Gene</b> | <b>Hypoxia (24 hr)</b> | <b>Hypoxia (24hr) + Reoxygenation (24 hr)</b> |
|-------------|------------------------|-----------------------------------------------|
| Il10ra      | -2.6205                | -2.4672                                       |
| Il13ra1     | -3.7483                | -2.5841                                       |
| Il1r1       | -1.1711                | -1.0348                                       |
| Il1r2       | 1.4078                 | 1.8353                                        |
| Il2rb       | -46.6085               | -43.8821                                      |
| Il2rg       | -2.1442                | -1.642                                        |
| Il5ra       | -2.6205                | -2.4672                                       |
| Il6ra       | -2.3171                | 1.0711                                        |
| Il6st       | -1.5086                | -1.0064                                       |
| Tnfrsf1a    | -1.654                 | 1.0704                                        |
| Tnfrsf1b    | -1.5747                | 1.0298                                        |

**Table 5. Effects of HP on Other Inflammatory Genes in BMSCs (fold alterations vs. normoxic control BMSCs)**

| <b>Gene</b>      | <b>Hypoxia (24 hr)</b> | <b>Hypoxia (24hr) + Reoxygenation (24 hr)</b> |
|------------------|------------------------|-----------------------------------------------|
| Abcf1            | -12.8493               | -4.7607                                       |
| Bcl6_predicted   | 1.8998                 | 1.8997                                        |
| Blr1             | -1.2496                | -84.376                                       |
| Complement C3    | -139.664               | -131.495                                      |
| Casp1            | -2.8529                | -3.2386                                       |
| Crp              | -2.6205                | -2.4672                                       |
| Tollip_predicted | -1.6281                | -1.675                                        |
